# Supplementary material for: Systematic Search for SARS-CoV-2 Main Protease Inhibitors for Drug Repurposing: Ethacrynic Acid as a Potential Drug
Source: Viruses. 2021 Jan 13;13(1):106. doi: 10.3390/v13010106 (PMC7828626; doi:10.3390/v13010106)
Supplement: Supplementary file 1 [file viruses-13-00106-s001.csv]

ZINC ID	binding affinity on 5RET
ZINC000000000053	-5.2
ZINC000000000061	-5.1
ZINC000000000083	-4.1
ZINC000000000096	-5.7
ZINC000000000122	-6.2
ZINC000000000122	-6.2
ZINC000000000128	-6.6
ZINC000000000196	-5.7
ZINC000000000196	-5.7
ZINC000000000215	-4.8
ZINC000000000215	-4.7
ZINC000000000242	-5.6
ZINC000000000242	-5.6
ZINC000000000257	-5.2
ZINC000000000271	-5.2
ZINC000000000323	-6.2
ZINC000000000346	-6
ZINC000000000347	-6.9
ZINC000000000347	-6.6
ZINC000000000347	-6.6
ZINC000000000353	-5.2
ZINC000000000373	-4.5
ZINC000000000416	-6.8
ZINC000000000416	-6.6
ZINC000000000431	-7.1
ZINC000000000449	-6.7
ZINC000000000456	-5.8
ZINC000000000456	-5.8
ZINC000000000456	-5.7
ZINC000000000469	-5.6
ZINC000000000471	-6.4
ZINC000000000490	-4.9
ZINC000000000494	-5.7
ZINC000000000506	-5.1
ZINC000000000507	-5.9
ZINC000000000507	-5.7
ZINC000000000509	-7.3
ZINC000000000509	-6.8
ZINC000000000509	-6.8
ZINC000000000565	-5.8
ZINC000000000565	-5.7
ZINC000000000575	-6.9
ZINC000000000596	-6.7
ZINC000000000596	-6.5
ZINC000000000607	-5.4
ZINC000000000655	-7.3
ZINC000000000693	-5.3
ZINC000000000711	-5
ZINC000000000740	-7.4
ZINC000000000746	-5.9
ZINC000000000751	-6.5
ZINC000000000751	-6.5
ZINC000000000751	-6.4
ZINC000000000850	-6.2
ZINC000000000850	-6.2
ZINC000000000853	-5.6
ZINC000000000856	-6
ZINC000000000856	-5.9
ZINC000000000882	-4.8
ZINC000000000882	-4.6
ZINC000000000903	-7.5
ZINC000000000905	-4.9
ZINC000000000905	-4.9
ZINC000000000922	-5.3
ZINC000000000931	-7.1
ZINC000000000931	-7.1
ZINC000000000941	-6.4
ZINC000000000973	-6.3
ZINC000000000973	-6.2
ZINC000000001011	-4.4
ZINC000000001084	-5.3
ZINC000000001115	-5.3
ZINC000000001132	-4.5
ZINC000000001145	-6.7
ZINC000000001145	-6.4
ZINC000000001148	-6.8
ZINC000000001261	-6.9
ZINC000000001267	-5.7
ZINC000000001281	-6.7
ZINC000000001317	-6.5
ZINC000000001331	-6.5
ZINC000000001341	-4.8
ZINC000000001341	-4.8
ZINC000000001370	-7
ZINC000000001382	-5.9
ZINC000000001408	-5.4
ZINC000000001411	-4.9
ZINC000000001464	-6.8
ZINC000000001505	-6
ZINC000000001554	-5.2
ZINC000000001587	-6.2
ZINC000000001644	-5
ZINC000000001655	-6.4
ZINC000000001681	-5.5
ZINC000000001681	-5.5
ZINC000000001688	-5.3
ZINC000000001688	-5.3
ZINC000000001706	-4
ZINC000000001728	-5.8
ZINC000000001735	-6
ZINC000000001758	-6.2
ZINC000000001773	-7.5
ZINC000000001773	-7.4
ZINC000000001773	-7.2
ZINC000000001792	-5.3
ZINC000000001795	-4.2
ZINC000000001798	-4.7
ZINC000000001798	-4.6
ZINC000000001798	-4.5
ZINC000000001850	-6.7
ZINC000000001899	-6.1
ZINC000000001931	-5.8
ZINC000000001931	-5.5
ZINC000000001958	-5.5
ZINC000000001979	-5.4
ZINC000000001982	-5.3
ZINC000000001984	-6.5
ZINC000000002005	-4.4
ZINC000000002009	-4.7
ZINC000000002028	-4.3
ZINC000000002041	-5.9
ZINC000000002043	-5.7
ZINC000000002043	-5.6
ZINC000000002055	-5.4
ZINC000000002055	-5.1
ZINC000000002101	-4.8
ZINC000000002159	-6.3
ZINC000000002176	-5.6
ZINC000000002191	-6.2
ZINC000000002212	-7.6
ZINC000000002216	-5.7
ZINC000000002216	-5.7
ZINC000000002272	-6.6
ZINC000000002273	-5.7
ZINC000000002279	-6.7
ZINC000000002281	-6
ZINC000000002299	-7.4
ZINC000000002299	-7.1
ZINC000000002299	-7.1
ZINC000000002647	-5.2
ZINC000000002688	-7.1
ZINC000000003642	-6.1
ZINC000000003876	-7
ZINC000000003911	-7.1
ZINC000000004009	-6.1
ZINC000000004028	-6.4
ZINC000000004028	-6.4
ZINC000000004076	-7.4
ZINC000000004166	-5.7
ZINC000000004319	-6.7
ZINC000000004319	-6.1
ZINC000000004321	-6.3
ZINC000000004351	-6.8
ZINC000000004351	-6.8
ZINC000000004413	-5.4
ZINC000000004413	-5.4
ZINC000000004448	-6.7
ZINC000000004448	-6.6
ZINC000000004724	-6.8
ZINC000000004778	-7.1
ZINC000000004785	-6.7
ZINC000000004840	-6.3
ZINC000000004893	-7.3
ZINC000000004893	-7.1
ZINC000000004893	-7
ZINC000000004949	-4.1
ZINC000000005151	-6.5
ZINC000000005151	-6.2
ZINC000000005152	-4.2
ZINC000000005423	-6
ZINC000000005560	-6.6
ZINC000000005823	-7.1
ZINC000000005823	-7.1
ZINC000000005823	-7
ZINC000000005823	-6.9
ZINC000000005878	-4.4
ZINC000000005895	-6
ZINC000000006016	-5.9
ZINC000000006016	-5.9
ZINC000000006156	-5.9
ZINC000000006157	-7.2
ZINC000000006226	-5.3
ZINC000000006251	-6.6
ZINC000000006251	-6.5
ZINC000000006300	-6.7
ZINC000000006310	-5.9
ZINC000000006427	-6.6
ZINC000000006481	-5.4
ZINC000000007295	-7.2
ZINC000000007601	-5.8
ZINC000000007673	-5.6
ZINC000000007782	-6.1
ZINC000000008492	-5
ZINC000000008667	-6.7
ZINC000000009073	-8.1
ZINC000000009073	-8
ZINC000000009073	-8
ZINC000000009342	-6.1
ZINC000000009342	-6.1
ZINC000000009689	-6.5
ZINC000000010163	-5.1
ZINC000000010163	-4.9
ZINC000000010164	-4.9
ZINC000000010164	-4.8
ZINC000000011012	-6.5
ZINC000000012346	-5.7
ZINC000000013156	-6.3
ZINC000000013156	-5.9
ZINC000000014007	-5.7
ZINC000000014037	-5.3
ZINC000000014257	-5.3
ZINC000000014360	-6.1
ZINC000000014864	-6.9
ZINC000000015515	-6.7
ZINC000000016154	-6.5
ZINC000000018087	-6.6
ZINC000000018635	-6.8
ZINC000000020220	-8.4
ZINC000000020220	-8.2
ZINC000000020221	-5.8
ZINC000000020228	-5.2
ZINC000000020228	-5
ZINC000000020230	-5.9
ZINC000000020231	-5.3
ZINC000000020231	-5.3
ZINC000000020237	-5.3
ZINC000000020237	-5.2
ZINC000000020240	-5.7
ZINC000000020241	-6.4
ZINC000000020243	-6.6
ZINC000000020244	-5.6
ZINC000000020244	-5.5
ZINC000000020245	-6.2
ZINC000000020248	-6.4
ZINC000000020250	-6.5
ZINC000000020251	-6.5
ZINC000000020253	-7.3
ZINC000000020255	-6.1
ZINC000000020257	-4.7
ZINC000000020259	-4.5
ZINC000000020783	-5.2
ZINC000000025958	-7.4
ZINC000000033882	-5.2
ZINC000000034157	-5.5
ZINC000000035804	-6.8
ZINC000000039089	-5.4
ZINC000000044027	-6.2
ZINC000000049153	-5.8
ZINC000000049154	-5
ZINC000000056427	-5.1
ZINC000000056556	-5.7
ZINC000000056568	-5
ZINC000000056645	-5.6
ZINC000000056646	-5.8
ZINC000000056647	-6.2
ZINC000000056652	-5.9
ZINC000000056653	-5.8
ZINC000000057001	-4.9
ZINC000000057062	-4.8
ZINC000000057146	-6.3
ZINC000000057147	-6.3
ZINC000000057206	-5.6
ZINC000000057206	-5.5
ZINC000000057253	-5.6
ZINC000000057253	-5.5
ZINC000000057254	-5.7
ZINC000000057254	-5.4
ZINC000000057255	-7.4
ZINC000000057278	-7
ZINC000000057313	-6
ZINC000000057340	-5.3
ZINC000000057341	-5.5
ZINC000000057435	-5.7
ZINC000000057464	-5.5
ZINC000000057464	-5.4
ZINC000000057512	-6.8
ZINC000000057512	-6.6
ZINC000000057512	-6.5
ZINC000000057512	-6.5
ZINC000000057513	-5.6
ZINC000000057513	-5.6
ZINC000000057522	-6.8
ZINC000000057532	-5.7
ZINC000000057533	-6.1
ZINC000000057534	-5.4
ZINC000000057624	-5.2
ZINC000000074836	-4.4
ZINC000000075008	-5.3
ZINC000000075008	-5.2
ZINC000000075126	-7.3
ZINC000000075126	-7
ZINC000000083315	-5.7
ZINC000000085733	-5.1
ZINC000000089763	-6.7
ZINC000000089763	-6.7
ZINC000000097996	-4.9
ZINC000000105196	-4.9
ZINC000000105216	-5.7
ZINC000000113355	-4.7
ZINC000000113382	-6.2
ZINC000000113382	-6
ZINC000000113398	-5.8
ZINC000000113404	-5.9
ZINC000000113410	-5.5
ZINC000000113415	-5.6
ZINC000000113426	-5.4
ZINC000000113428	-5.7
ZINC000000113442	-4.7
ZINC000000113446	-5.1
ZINC000000114124	-3.4
ZINC000000114127	-3.4
ZINC000000119344	-5.7
ZINC000000119717	-5.7
ZINC000000120286	-6.6
ZINC000000120319	-6
ZINC000000120319	-5.9
ZINC000000121480	-6.3
ZINC000000121541	-7.1
ZINC000000136138	-6
ZINC000000136138	-5.9
ZINC000000137884	-6
ZINC000000154964	-6
ZINC000000154964	-5.9
ZINC000000154964	-5.7
ZINC000000155269	-5.6
ZINC000000155269	-5.5
ZINC000000155531	-5.9
ZINC000000155531	-5.6
ZINC000000155905	-4.7
ZINC000000156395	-5.8
ZINC000000156792	-6.1
ZINC000000266964	-5.2
ZINC000000388081	-3.8
ZINC000000388081	-3.7
ZINC000000388081	-3.7
ZINC000000388462	-4.5
ZINC000000389149	-5.8
ZINC000000389747	-7.4
ZINC000000389747	-7.4
ZINC000000389747	-7.3
ZINC000000391812	-4.8
ZINC000000391812	-4.6
ZINC000000391812	-4.4
ZINC000000394284	-5.1
ZINC000000395010	-5.1
ZINC000000402830	-6.3
ZINC000000402830	-6.1
ZINC000000402909	-6.6
ZINC000000402954	-7.4
ZINC000000402954	-7.4
ZINC000000402954	-7.3
ZINC000000403010	-6.1
ZINC000000403010	-6
ZINC000000403011	-7.2
ZINC000000403011	-5.7
ZINC000000403079	-6.3
ZINC000000403079	-6.1
ZINC000000403533	-7.6
ZINC000000403533	-7.6
ZINC000000403533	-7.5
ZINC000000403566	-6.8
ZINC000000403609	-6.1
ZINC000000403618	-3.8
ZINC000000491073	-6.9
ZINC000000491073	-6.8
ZINC000000491073	-6.8
ZINC000000508068	-5.4
ZINC000000509440	-7.1
ZINC000000518554	-6.5
ZINC000000527386	-6.7
ZINC000000537752	-7.2
ZINC000000537752	-6.3
ZINC000000537791	-7.8
ZINC000000537791	-7.6
ZINC000000537791	-7.6
ZINC000000537791	-7.4
ZINC000000537795	-7.6
ZINC000000537795	-7.2
ZINC000000537795	-7.2
ZINC000000537795	-7.2
ZINC000000537805	-7.4
ZINC000000537805	-7.3
ZINC000000537805	-7.1
ZINC000000537805	-6.9
ZINC000000537822	-6.4
ZINC000000537822	-6.3
ZINC000000537891	-7.5
ZINC000000537891	-7.5
ZINC000000537928	-7.2
ZINC000000537931	-7.3
ZINC000000537957	-6.1
ZINC000000537964	-7.4
ZINC000000538065	-6.2
ZINC000000538065	-6.1
ZINC000000538266	-6.7
ZINC000000538273	-7.8
ZINC000000538273	-7.5
ZINC000000538275	-7.6
ZINC000000538275	-7.4
ZINC000000538283	-6.3
ZINC000000538283	-6.3
ZINC000000538312	-8
ZINC000000538312	-7.9
ZINC000000538386	-6.1
ZINC000000538386	-6
ZINC000000538483	-7.4
ZINC000000538483	-7
ZINC000000538509	-6
ZINC000000538509	-5.9
ZINC000000538550	-7.6
ZINC000000538550	-7.5
ZINC000000538564	-6.9
ZINC000000538621	-7.1
ZINC000000538621	-7.1
ZINC000000538627	-7.2
ZINC000000538658	-7.9
ZINC000000584092	-6.7
ZINC000000591993	-5.7
ZINC000000592419	-7
ZINC000000596731	-6.1
ZINC000000596731	-5.9
ZINC000000596881	-6.9
ZINC000000596881	-6.4
ZINC000000597013	-6.6
ZINC000000597013	-6.5
ZINC000000599734	-7
ZINC000000599985	-3.5
ZINC000000599985	-3.5
ZINC000000601229	-7.8
ZINC000000601229	-7.7
ZINC000000601229	-7.5
ZINC000000601250	-6.3
ZINC000000601250	-6.3
ZINC000000601254	-6.9
ZINC000000601281	-6.5
ZINC000000601281	-6.3
ZINC000000601283	-6.9
ZINC000000601301	-7.6
ZINC000000601305	-6.7
ZINC000000601316	-6.9
ZINC000000601317	-7.7
ZINC000000602128	-6.3
ZINC000000602632	-7.1
ZINC000000606383	-7
ZINC000000606383	-6.7
ZINC000000607790	-7
ZINC000000607939	-7.1
ZINC000000607971	-7.1
ZINC000000607971	-6.6
ZINC000000607986	-6.8
ZINC000000607986	-6.8
ZINC000000608101	-6.4
ZINC000000608101	-6.1
ZINC000000608382	-7.5
ZINC000000608382	-7.2
ZINC000000621853	-6.3
ZINC000000621893	-7
ZINC000000621893	-6.9
ZINC000000622123	-6.9
ZINC000000643046	-5.9
ZINC000000643055	-6.9
ZINC000000643055	-6.7
ZINC000000643114	-6.6
ZINC000000643138	-7.7
ZINC000000643138	-7.7
ZINC000000643143	-7.5
ZINC000000643143	-6.8
ZINC000000643153	-7.6
ZINC000000643153	-7.5
ZINC000000895032	-4.1
ZINC000000895034	-4.5
ZINC000000895034	-4.4
ZINC000000895042	-3.5
ZINC000000895048	-4.1
ZINC000000895081	-4.3
ZINC000000895099	-3.9
ZINC000000895103	-4.3
ZINC000000895154	-6
ZINC000000895154	-6
ZINC000000895154	-5.8
ZINC000000895199	-5.6
ZINC000000895302	-3.9
ZINC000000895316	-3.6
ZINC000000895318	-3.7
ZINC000000895360	-4.1
ZINC000000895457	-4.4
ZINC000000896409	-4.1
ZINC000000896409	-4.1
ZINC000000896455	-5.5
ZINC000000896463	-5.7
ZINC000000896484	-5.2
ZINC000000896484	-5.2
ZINC000000896523	-5.8
ZINC000000896543	-7.5
ZINC000000896546	-4.5
ZINC000000896546	-4.4
ZINC000000896569	-6.6
ZINC000000896595	-7.2
ZINC000000896634	-7.2
ZINC000000896663	-4.2
ZINC000000896666	-4.1
ZINC000000896695	-4
ZINC000000896695	-3.9
ZINC000000896698	-5.7
ZINC000000896698	-5.7
ZINC000000896703	-5.4
ZINC000000896709	-5.6
ZINC000000896711	-5.5
ZINC000000896717	-7.5
ZINC000000896731	-6.1
ZINC000000896731	-5.9
ZINC000000896740	-7.1
ZINC000000896740	-6.8
ZINC000000896755	-6.8
ZINC000000896819	-5.7
ZINC000000896918	-6.2
ZINC000000896958	-6.1
ZINC000000896968	-6.1
ZINC000000897002	-6.1
ZINC000000897002	-6.1
ZINC000000897002	-6
ZINC000000897085	-7.5
ZINC000000897089	-7.2
ZINC000000897222	-7.9
ZINC000000897240	-7.2
ZINC000000897240	-7.2
ZINC000000897240	-7.1
ZINC000000897244	-5.2
ZINC000000897251	-6.9
ZINC000000897251	-6.9
ZINC000000897256	-6.8
ZINC000000897256	-6.8
ZINC000000897258	-6.8
ZINC000000897258	-5.8
ZINC000000897288	-3.5
ZINC000000897291	-5.2
ZINC000000897322	-5.9
ZINC000000897385	-6.4
ZINC000000897385	-6.1
ZINC000000897408	-7
ZINC000000901061	-4.9
ZINC000000901159	-2.7
ZINC000000901552	-3
ZINC000000901555	-3
ZINC000000901736	-4.3
ZINC000000901791	-4.4
ZINC000000967520	-4.5
ZINC000000967521	-4.4
ZINC000000967566	-4.3
ZINC000000967597	-4.6
ZINC000000968233	-5.2
ZINC000000968255	-5.4
ZINC000000968256	-4.3
ZINC000000968257	-6.2
ZINC000000968263	-6.3
ZINC000000968264	-6.8
ZINC000000968264	-6.8
ZINC000000968273	-6.4
ZINC000000968274	-6.4
ZINC000000968275	-6
ZINC000000968301	-6.4
ZINC000000968303	-4.8
ZINC000000968305	-5.5
ZINC000000968305	-4.9
ZINC000000968310	-7.3
ZINC000000968310	-7.2
ZINC000000968310	-7.2
ZINC000000968326	-6.7
ZINC000000968326	-6.6
ZINC000000968327	-7
ZINC000000968327	-6.8
ZINC000000968328	-6.3
ZINC000000968328	-6.3
ZINC000000968330	-7.3
ZINC000000968330	-7.2
ZINC000000968336	-6.1
ZINC000000968345	-4.9
ZINC000000968345	-4.9
ZINC000000968375	-6.8
ZINC000001035331	-6.3
ZINC000001187543	-3.3
ZINC000001280665	-7.6
ZINC000001280665	-7.5
ZINC000001280665	-7.4
ZINC000001319780	-7.3
ZINC000001319780	-6.6
ZINC000001481815	-7.8
ZINC000001481815	-7.8
ZINC000001481833	-6.2
ZINC000001481910	-4.1
ZINC000001481956	-8.4
ZINC000001481956	-8.3
ZINC000001482049	-5.8
ZINC000001482049	-5.7
ZINC000001482094	-4.1
ZINC000001482113	-4.3
ZINC000001482164	-4.4
ZINC000001482184	-6
ZINC000001482197	-4.2
ZINC000001485935	-6.9
ZINC000001489478	-7.8
ZINC000001489478	-7.8
ZINC000001493878	-7.8
ZINC000001529323	-7.2
ZINC000001529425	-3.7
ZINC000001530283	-5.4
ZINC000001530303	-4.7
ZINC000001530427	-4.3
ZINC000001530427	-4.1
ZINC000001530427	-4.1
ZINC000001530555	-6
ZINC000001530567	-5.3
ZINC000001530568	-5.1
ZINC000001530569	-5.5
ZINC000001530570	-5.3
ZINC000001530571	-7
ZINC000001530571	-6.9
ZINC000001530572	-5
ZINC000001530575	-6
ZINC000001530579	-6.4
ZINC000001530579	-6.3
ZINC000001530580	-6.7
ZINC000001530580	-6.5
ZINC000001530599	-6.3
ZINC000001530599	-6
ZINC000001530599	-6
ZINC000001530599	-5.8
ZINC000001530600	-6.1
ZINC000001530600	-5.9
ZINC000001530600	-5.9
ZINC000001530601	-6.3
ZINC000001530611	-5.9
ZINC000001530613	-5.6
ZINC000001530613	-5.5
ZINC000001530617	-6
ZINC000001530618	-6.2
ZINC000001530621	-6.9
ZINC000001530621	-6.7
ZINC000001530625	-6.4
ZINC000001530635	-6.4
ZINC000001530636	-6.4
ZINC000001530636	-6
ZINC000001530637	-6.4
ZINC000001530638	-6.4
ZINC000001530639	-7.5
ZINC000001530641	-5.5
ZINC000001530652	-6.1
ZINC000001530652	-6.1
ZINC000001530652	-6
ZINC000001530652	-5.9
ZINC000001530654	-6.2
ZINC000001530654	-6.1
ZINC000001530654	-6
ZINC000001530654	-5.7
ZINC000001530688	-6.9
ZINC000001530689	-7.1
ZINC000001530689	-7
ZINC000001530694	-7
ZINC000001530695	-6.6
ZINC000001530695	-6.6
ZINC000001530695	-6.6
ZINC000001530697	-6.6
ZINC000001530697	-6.6
ZINC000001530697	-6.5
ZINC000001530701	-5
ZINC000001530703	-6.3
ZINC000001530703	-6.2
ZINC000001530703	-6.1
ZINC000001530703	-6
ZINC000001530706	-5.6
ZINC000001530707	-5.5
ZINC000001530710	-4.3
ZINC000001530713	-6.2
ZINC000001530713	-6.2
ZINC000001530716	-5.6
ZINC000001530717	-5.3
ZINC000001530718	-4.9
ZINC000001530725	-5.5
ZINC000001530728	-5.7
ZINC000001530728	-5.6
ZINC000001530736	-5.7
ZINC000001530736	-5.5
ZINC000001530737	-5.6
ZINC000001530737	-5.5
ZINC000001530741	-6.1
ZINC000001530751	-6
ZINC000001530751	-5.9
ZINC000001530752	-6.1
ZINC000001530752	-5.9
ZINC000001530756	-5.2
ZINC000001530759	-5.7
ZINC000001530760	-5.8
ZINC000001530761	-6.6
ZINC000001530762	-5
ZINC000001530762	-5
ZINC000001530764	-6.3
ZINC000001530769	-5.3
ZINC000001530775	-5.7
ZINC000001530776	-6
ZINC000001530788	-7.7
ZINC000001530803	-5.9
ZINC000001530805	-4.3
ZINC000001530806	-4.4
ZINC000001530810	-4.1
ZINC000001530811	-5.2
ZINC000001530811	-4.9
ZINC000001530812	-6.2
ZINC000001530812	-6.2
ZINC000001530812	-6.1
ZINC000001530814	-6.3
ZINC000001530814	-6.2
ZINC000001530814	-6.1
ZINC000001530816	-5.5
ZINC000001530816	-5.1
ZINC000001530817	-5.1
ZINC000001530817	-5.1
ZINC000001530820	-5
ZINC000001530862	-5.6
ZINC000001530863	-5.6
ZINC000001530886	-7.8
ZINC000001530886	-7.8
ZINC000001530912	-5.9
ZINC000001530912	-5.9
ZINC000001530912	-5.9
ZINC000001530922	-7.6
ZINC000001530922	-7.6
ZINC000001530922	-7.5
ZINC000001530929	-5.4
ZINC000001530929	-5.2
ZINC000001530930	-5.4
ZINC000001530930	-5.1
ZINC000001530935	-6.3
ZINC000001530938	-5.3
ZINC000001530938	-5
ZINC000001530939	-6
ZINC000001530940	-5.7
ZINC000001530940	-5.4
ZINC000001530947	-6.7
ZINC000001530948	-6.5
ZINC000001530950	-5.4
ZINC000001530951	-5.5
ZINC000001530968	-6.3
ZINC000001530968	-6.2
ZINC000001530973	-6.4
ZINC000001530973	-6
ZINC000001530974	-6.1
ZINC000001530974	-5.9
ZINC000001530975	-6.2
ZINC000001530975	-6.1
ZINC000001530977	-6.5
ZINC000001530977	-6.4
ZINC000001530977	-6.2
ZINC000001530981	-5.9
ZINC000001530981	-5.9
ZINC000001530981	-5.7
ZINC000001531008	-4.7
ZINC000001531009	-5.8
ZINC000001531009	-5.6
ZINC000001531009	-5.4
ZINC000001531036	-4.3
ZINC000001532179	-4.7
ZINC000001532517	-3.4
ZINC000001532522	-4.2
ZINC000001532525	-4.3
ZINC000001532526	-4.5
ZINC000001532529	-3.9
ZINC000001532728	-3.3
ZINC000001532805	-3.6
ZINC000001533877	-5.3
ZINC000001533877	-5.2
ZINC000001533877	-5.1
ZINC000001533877	-5
ZINC000001533877	-5
ZINC000001533877	-4.7
ZINC000001534965	-7.8
ZINC000001535101	-6.9
ZINC000001536109	-8.1
ZINC000001536779	-6.2
ZINC000001538857	-7
ZINC000001539579	-7.4
ZINC000001540998	-7.1
ZINC000001542002	-5.3
ZINC000001542113	-8.3
ZINC000001542113	-8.2
ZINC000001542199	-5.9
ZINC000001542392	-6.6
ZINC000001542392	-6.4
ZINC000001542392	-6.1
ZINC000001542930	-6.5
ZINC000001543475	-6.4
ZINC000001543475	-6.4
ZINC000001543475	-6.4
ZINC000001543873	-6.3
ZINC000001543873	-5.7
ZINC000001543916	-6.6
ZINC000001543916	-6.5
ZINC000001546066	-6.5
ZINC000001547851	-4.7
ZINC000001548097	-7.4
ZINC000001548097	-7.1
ZINC000001550477	-7.5
ZINC000001550499	-6.1
ZINC000001552174	-7.4
ZINC000001552908	-6.7
ZINC000001554010	-6.2
ZINC000001554392	-4.6
ZINC000001554392	-4.6
ZINC000001554588	-4.6
ZINC000001571009	-6
ZINC000001576892	-5.2
ZINC000001611274	-7.9
ZINC000001611274	-7.8
ZINC000001612996	-9.1
ZINC000001633887	-4.7
ZINC000001633889	-5.4
ZINC000001639567	-4.2
ZINC000001690324	-6.9
ZINC000001690324	-6.9
ZINC000001690604	-4.7
ZINC000001698306	-5.1
ZINC000001842633	-5.7
ZINC000001843047	-4.6
ZINC000001843099	-6.8
ZINC000001843099	-6.3
ZINC000001843099	-6.2
ZINC000001846431	-4.5
ZINC000001849548	-5.1
ZINC000001850374	-6.7
ZINC000001850376	-6.5
ZINC000001850377	-6.4
ZINC000001851149	-7.7
ZINC000001851149	-7.2
ZINC000001853205	-6.4
ZINC000001853550	-6.6
ZINC000001883067	-5.9
ZINC000001886617	-7.5
ZINC000001895505	-7.2
ZINC000001995484	-6.5
ZINC000001995484	-6.5
ZINC000001996117	-7.9
ZINC000001996117	-7.4
ZINC000001996784	-6.6
ZINC000001997125	-6.7
ZINC000001997127	-6.6
ZINC000001999441	-7.1
ZINC000001999441	-7
ZINC000001999487	-6.9
ZINC000002000707	-6.5
ZINC000002005305	-7.8
ZINC000002005305	-7.7
ZINC000002005305	-7.6
ZINC000002005550	-5.2
ZINC000002005550	-5.1
ZINC000002008310	-6.1
ZINC000002008866	-7.7
ZINC000002015035	-5.8
ZINC000002015035	-5.8
ZINC000002015928	-6.6
ZINC000002016037	-7.6
ZINC000002016037	-7.3
ZINC000002016257	-4.6
ZINC000002016258	-5.2
ZINC000002019953	-5.6
ZINC000002019953	-5.6
ZINC000002019954	-5.4
ZINC000002019954	-5.4
ZINC000002020233	-6.4
ZINC000002032615	-6.7
ZINC000002036848	-7.6
ZINC000002036848	-7.3
ZINC000002169830	-6.6
ZINC000002510358	-6.4
ZINC000002510358	-6.4
ZINC000002519740	-6.4
ZINC000002519740	-6.4
ZINC000002519740	-6.3
ZINC000002522648	-5.5
ZINC000002522669	-6.9
ZINC000002522669	-6.8
ZINC000002525885	-5.8
ZINC000002525885	-5.7
ZINC000002539702	-5.1
ZINC000002539827	-6.1
ZINC000002539827	-5.9
ZINC000002539827	-5.9
ZINC000002548959	-6.1
ZINC000002561203	-5
ZINC000002568036	-8
ZINC000002568036	-7.8
ZINC000002570817	-6.7
ZINC000002570895	-7.7
ZINC000002599970	-6.7
ZINC000002599970	-6.3
ZINC000002847375	-4.9
ZINC000002847375	-4.9
ZINC000003008621	-4
ZINC000003079336	-3.9
ZINC000003079337	-3.1
ZINC000003079340	-3.9
ZINC000003079342	-4.1
ZINC000003201907	-6.8
ZINC000003201907	-6.4
ZINC000003581355	-4
ZINC000003589203	-4.4
ZINC000003604264	-6.9
ZINC000003607120	-8.3
ZINC000003607120	-8.1
ZINC000003629271	-5.9
ZINC000003645145	-4
ZINC000003651680	-5.1
ZINC000003651680	-5.1
ZINC000003775644	-6.4
ZINC000003775644	-6.3
ZINC000003776633	-7.1
ZINC000003776633	-6.9
ZINC000003776875	-4
ZINC000003776970	-7.3
ZINC000003776970	-6.9
ZINC000003779042	-6.9
ZINC000003780893	-7.2
ZINC000003781664	-5
ZINC000003781943	-7.3
ZINC000003782550	-4.4
ZINC000003782550	-4.3
ZINC000003782599	-7.4
ZINC000003782807	-7.3
ZINC000003782818	-7.8
ZINC000003782818	-7.8
ZINC000003784120	-6.2
ZINC000003784182	-7.2
ZINC000003785268	-5.7
ZINC000003785276	-4.8
ZINC000003786192	-6.7
ZINC000003787060	-6.1
ZINC000003787097	-8.2
ZINC000003791297	-6.6
ZINC000003792417	-6.6
ZINC000003792789	-6.3
ZINC000003794601	-6.4
ZINC000003794711	-5.7
ZINC000003794711	-5.3
ZINC000003794711	-5
ZINC000003794794	-6.8
ZINC000003795098	-6.3
ZINC000003795819	-6.8
ZINC000003795819	-6.8
ZINC000003797541	-8.2
ZINC000003798064	-6.7
ZINC000003798247	-6.1
ZINC000003798537	-6.8
ZINC000003798734	-5.9
ZINC000003798750	-3.8
ZINC000003798757	-6.9
ZINC000003798763	-7
ZINC000003799072	-6.2
ZINC000003800008	-7.7
ZINC000003800008	-7
ZINC000003800008	-7
ZINC000003800475	-6.7
ZINC000003800706	-6.4
ZINC000003801163	-7.1
ZINC000003801919	-4.9
ZINC000003801919	-4.6
ZINC000003801919	-4.5
ZINC000003802417	-7.8
ZINC000003802417	-7.7
ZINC000003802690	-6.6
ZINC000003803652	-5
ZINC000003805768	-7.4
ZINC000003805768	-7.4
ZINC000003806063	-6.5
ZINC000003806104	-6.2
ZINC000003806262	-6.5
ZINC000003806262	-6.4
ZINC000003806413	-6.7
ZINC000003806413	-6.6
ZINC000003806721	-6.8
ZINC000003806721	-6.8
ZINC000003807172	-7.7
ZINC000003807804	-6.8
ZINC000003807804	-6.5
ZINC000003807917	-7
ZINC000003808779	-7.1
ZINC000003809490	-3.5
ZINC000003810860	-6.9
ZINC000003812306	-6.9
ZINC000003812841	-7.3
ZINC000003812851	-6.9
ZINC000003812851	-6.4
ZINC000003812862	-4.8
ZINC000003812862	-4.3
ZINC000003812862	-4.2
ZINC000003812863	-6.5
ZINC000003812863	-6.3
ZINC000003812865	-7.2
ZINC000003812867	-6.1
ZINC000003812869	-7.2
ZINC000003812869	-7
ZINC000003812888	-5.9
ZINC000003812888	-5.7
ZINC000003812897	-6.6
ZINC000003812913	-5.5
ZINC000003812933	-4.7
ZINC000003812944	-6.1
ZINC000003812974	-6.2
ZINC000003812983	-7
ZINC000003812983	-7
ZINC000003812984	-6.6
ZINC000003812984	-6.5
ZINC000003812988	-7
ZINC000003812988	-7
ZINC000003812989	-7.3
ZINC000003812989	-7.2
ZINC000003813003	-7.4
ZINC000003813010	-6.2
ZINC000003813010	-6.1
ZINC000003813042	-5.8
ZINC000003813047	-7.1
ZINC000003813061	-6.2
ZINC000003813078	-5.7
ZINC000003813083	-6.3
ZINC000003813088	-5.7
ZINC000003814395	-6.7
ZINC000003814422	-7.1
ZINC000003815424	-6.6
ZINC000003816287	-7.7
ZINC000003816292	-8.4
ZINC000003816514	-7.7
ZINC000003816514	-7.7
ZINC000003817234	-7.7
ZINC000003817234	-7
ZINC000003818726	-7.2
ZINC000003818726	-7
ZINC000003818808	-6.5
ZINC000003818808	-6.5
ZINC000003819138	-7
ZINC000003819392	-7.5
ZINC000003820029	-7.8
ZINC000003823475	-7.2
ZINC000003823475	-7.2
ZINC000003823475	-6.7
ZINC000003823492	-6.3
ZINC000003824921	-6.9
ZINC000003826253	-7.7
ZINC000003827556	-8.9
ZINC000003830212	-6.1
ZINC000003830212	-6.1
ZINC000003830215	-7.4
ZINC000003830215	-7
ZINC000003830218	-7.2
ZINC000003830218	-6.9
ZINC000003830264	-6.8
ZINC000003830276	-4.6
ZINC000003830314	-4.3
ZINC000003830321	-7.8
ZINC000003830339	-6
ZINC000003830347	-5
ZINC000003830347	-5
ZINC000003830387	-4.4
ZINC000003830391	-7.3
ZINC000003830391	-6.9
ZINC000003830405	-7.1
ZINC000003830441	-8.1
ZINC000003830449	-7.4
ZINC000003830453	-6.7
ZINC000003830500	-7.2
ZINC000003830500	-7
ZINC000003830569	-5
ZINC000003830579	-7
ZINC000003830635	-5.5
ZINC000003830713	-5.7
ZINC000003830716	-7.7
ZINC000003830716	-7.7
ZINC000003830813	-4.4
ZINC000003830813	-4.4
ZINC000003830813	-4.4
ZINC000003830842	-7
ZINC000003830891	-5.5
ZINC000003830947	-5.9
ZINC000003830957	-5.8
ZINC000003830958	-5.7
ZINC000003830959	-5.9
ZINC000003830960	-6
ZINC000003830961	-5.4
ZINC000003830986	-7.2
ZINC000003830990	-4.4
ZINC000003830993	-6.3
ZINC000003830993	-6
ZINC000003830999	-6.9
ZINC000003830999	-6.7
ZINC000003831040	-3.5
ZINC000003831050	-4
ZINC000003831051	-3.8
ZINC000003831128	-7.1
ZINC000003831138	-5.6
ZINC000003831139	-5.8
ZINC000003831151	-7.5
ZINC000003831165	-6.2
ZINC000003831282	-6.7
ZINC000003831332	-5.8
ZINC000003831404	-6.6
ZINC000003831404	-6.6
ZINC000003831405	-6.6
ZINC000003831405	-6.6
ZINC000003831417	-5.7
ZINC000003831429	-4.8
ZINC000003831430	-4.8
ZINC000003831474	-3.9
ZINC000003831475	-3.6
ZINC000003831477	-4
ZINC000003831490	-7.7
ZINC000003831490	-7.3
ZINC000003831531	-6.9
ZINC000003831531	-6.2
ZINC000003831551	-4.8
ZINC000003831586	-6.2
ZINC000003833821	-7.1
ZINC000003833846	-8.4
ZINC000003833846	-7.7
ZINC000003833846	-7.6
ZINC000003842753	-6.9
ZINC000003842753	-6.7
ZINC000003843198	-7
ZINC000003843378	-4.1
ZINC000003860453	-8.3
ZINC000003861599	-7.3
ZINC000003861768	-6
ZINC000003861806	-7.5
ZINC000003871541	-6.4
ZINC000003871701	-6.5
ZINC000003871703	-6.6
ZINC000003871832	-5.6
ZINC000003871832	-5.5
ZINC000003871923	-7.3
ZINC000003871960	-6.9
ZINC000003871967	-7
ZINC000003871978	-6.9
ZINC000003872055	-6.5
ZINC000003872277	-5.7
ZINC000003872520	-4.6
ZINC000003872566	-8
ZINC000003872605	-6.2
ZINC000003872605	-6.1
ZINC000003872738	-5.8
ZINC000003872931	-7.5
ZINC000003872931	-7.4
ZINC000003872994	-7.4
ZINC000003872994	-7.4
ZINC000003873160	-6.8
ZINC000003873160	-6.7
ZINC000003873295	-6.6
ZINC000003873295	-6.5
ZINC000003873296	-6.8
ZINC000003873296	-6.5
ZINC000003873371	-6.7
ZINC000003873371	-6.7
ZINC000003873921	-7.9
ZINC000003873936	-7.6
ZINC000003873936	-7.6
ZINC000003874185	-7.1
ZINC000003874498	-6.4
ZINC000003874715	-7
ZINC000003874950	-5.3
ZINC000003874950	-5.1
ZINC000003875259	-7
ZINC000003875259	-7
ZINC000003875332	-7.4
ZINC000003875334	-7.7
ZINC000003875342	-5.6
ZINC000003875357	-7.4
ZINC000003875368	-6.7
ZINC000003875368	-6.3
ZINC000003875392	-6.8
ZINC000003875392	-6.8
ZINC000003875392	-6.2
ZINC000003875393	-6.7
ZINC000003875393	-6.7
ZINC000003875393	-6.4
ZINC000003875439	-7.7
ZINC000003875483	-7.4
ZINC000003875483	-7.4
ZINC000003875483	-7.4
ZINC000003875484	-7.4
ZINC000003875560	-7.4
ZINC000003875980	-7.2
ZINC000003876023	-6.8
ZINC000003876068	-5.4
ZINC000003876068	-5.2
ZINC000003876069	-5.3
ZINC000003876069	-5.3
ZINC000003876136	-7.3
ZINC000003876186	-7.6
ZINC000003881640	-7.4
ZINC000003881958	-7.2
ZINC000003882036	-7.3
ZINC000003913937	-7.3
ZINC000003914596	-8.2
ZINC000003914596	-8.2
ZINC000003914596	-8.1
ZINC000003914808	-6.8
ZINC000003914809	-7.2
ZINC000003914810	-7
ZINC000003915154	-8.1
ZINC000003916214	-7.7
ZINC000003916214	-7.6
ZINC000003917708	-8.8
ZINC000003918138	-6.3
ZINC000003918453	-7.8
ZINC000003920027	-6.7
ZINC000003920266	-9.5
ZINC000003920266	-9.4
ZINC000003920355	-6.2
ZINC000003920657	-7.4
ZINC000003920719	-7.3
ZINC000003921872	-7.7
ZINC000003922770	-7.3
ZINC000003925861	-7.3
ZINC000003926298	-6.5
ZINC000003927198	-7.3
ZINC000003927198	-7
ZINC000003927200	-8
ZINC000003927822	-7.9
ZINC000003927822	-7.8
ZINC000003927870	-7.3
ZINC000003927870	-7.2
ZINC000003927870	-7.2
ZINC000003929022	-6.4
ZINC000003929508	-5.7
ZINC000003930376	-6.8
ZINC000003931840	-7
ZINC000003931840	-6.7
ZINC000003932831	-8.9
ZINC000003936683	-7.8
ZINC000003936683	-7.8
ZINC000003938482	-7.3
ZINC000003938652	-6.8
ZINC000003938684	-8
ZINC000003938686	-8.5
ZINC000003938686	-8.5
ZINC000003938695	-6.9
ZINC000003938704	-9.2
ZINC000003938704	-9
ZINC000003938744	-8.1
ZINC000003938746	-7.8
ZINC000003938746	-7.7
ZINC000003938746	-7.7
ZINC000003938751	-7.7
ZINC000003939013	-7.7
ZINC000003940470	-6.8
ZINC000003941496	-5.9
ZINC000003941829	-7.4
ZINC000003941829	-7.3
ZINC000003941829	-7.3
ZINC000003943279	-7.3
ZINC000003944422	-6.5
ZINC000003945984	-7.3
ZINC000003951740	-7.8
ZINC000003952881	-7.6
ZINC000003953037	-6.7
ZINC000003953037	-6.6
ZINC000003955219	-6.8
ZINC000003956788	-6.6
ZINC000003960338	-6.9
ZINC000003964126	-7.8
ZINC000003964325	-6.4
ZINC000003972949	-6
ZINC000003972949	-5.7
ZINC000003973334	-7.1
ZINC000003976838	-7.9
ZINC000003976838	-7.6
ZINC000003977764	-6.1
ZINC000003977777	-8.2
ZINC000003977978	-8
ZINC000003977981	-8.1
ZINC000003978005	-8.6
ZINC000003978005	-8.6
ZINC000003978005	-8.3
ZINC000003978006	-7
ZINC000003979899	-5.1
ZINC000003981610	-6
ZINC000003982483	-6.6
ZINC000003982483	-6.3
ZINC000003982483	-6.2
ZINC000003985982	-7.5
ZINC000003986735	-7.5
ZINC000003986735	-7.5
ZINC000003986735	-7.4
ZINC000003989268	-7.5
ZINC000003990451	-7.7
ZINC000003991624	-6
ZINC000003992105	-7
ZINC000003993846	-6.8
ZINC000003993855	-8
ZINC000003995807	-6.9
ZINC000003995809	-6.7
ZINC000003995811	-6.4
ZINC000004074875	-7
ZINC000004074875	-6.9
ZINC000004083606	-7.2
ZINC000004095696	-6
ZINC000004095858	-6.2
ZINC000004097225	-5.9
ZINC000004097286	-7.7
ZINC000004097304	-7.5
ZINC000004097305	-7.8
ZINC000004097308	-8
ZINC000004097309	-6.4
ZINC000004097310	-6.6
ZINC000004097343	-7.8
ZINC000004097344	-7.7
ZINC000004097383	-7.5
ZINC000004097392	-4
ZINC000004097404	-7.4
ZINC000004097416	-6.5
ZINC000004097426	-5.6
ZINC000004097426	-5.4
ZINC000004097426	-5
ZINC000004097427	-7.2
ZINC000004097427	-7
ZINC000004097467	-7.6
ZINC000004097476	-5.2
ZINC000004099008	-8.3
ZINC000004099009	-8.1
ZINC000004099200	-6.7
ZINC000004099200	-6.6
ZINC000004102194	-6.3
ZINC000004175630	-8.8
ZINC000004175630	-8.2
ZINC000004212809	-7.7
ZINC000004212851	-7.6
ZINC000004212854	-7.9
ZINC000004212945	-7
ZINC000004213946	-7
ZINC000004213946	-7
ZINC000004214700	-8
ZINC000004214700	-7.9
ZINC000004215234	-7
ZINC000004215736	-6.7
ZINC000004215736	-6.7
ZINC000004216238	-6.9
ZINC000004217732	-6.3
ZINC000004228257	-6.2
ZINC000004228257	-6.1
ZINC000004228257	-6
ZINC000004228258	-6.1
ZINC000004228258	-6.1
ZINC000004228258	-6
ZINC000004258316	-6.3
ZINC000004340269	-5.7
ZINC000004340269	-5.6
ZINC000004392649	-6.3
ZINC000004393164	-6
ZINC000004428529	-7.3
ZINC000004468778	-7
ZINC000004468780	-7
ZINC000004474405	-6.5
ZINC000004474414	-6.8
ZINC000004474443	-7.6
ZINC000004474443	-7.5
ZINC000004474460	-6.9
ZINC000004474564	-5
ZINC000004474603	-5.2
ZINC000004474682	-6.4
ZINC000004475353	-6.6
ZINC000004577910	-4.6
ZINC000004618208	-6.2
ZINC000004629876	-7.3
ZINC000004632106	-5.5
ZINC000004632106	-5.5
ZINC000004640636	-4.8
ZINC000004640636	-4.5
ZINC000004641374	-7.2
ZINC000004655029	-7.8
ZINC000004655029	-7.7
ZINC000004658290	-4.8
ZINC000004658290	-4.7
ZINC000004658552	-3.3
ZINC000004658553	-3.5
ZINC000004658557	-3.5
ZINC000004658560	-3.6
ZINC000004658562	-3.8
ZINC000004658603	-4.1
ZINC000004658603	-3.7
ZINC000004676424	-6.8
ZINC000004676424	-6.8
ZINC000004693574	-6.7
ZINC000004693574	-6.7
ZINC000004693575	-6.9
ZINC000004693575	-6.8
ZINC000004978673	-4.4
ZINC000005029557	-7.4
ZINC000005133329	-3.9
ZINC000005133378	-4.2
ZINC000005162311	-6.7
ZINC000005179119	-5.5
ZINC000005224188	-2.5
ZINC000005456939	-6.4
ZINC000005733652	-7.4
ZINC000005733652	-7.4
ZINC000005733652	-7.3
ZINC000005733652	-7.3
ZINC000005752191	-7.4
ZINC000005764759	-7.7
ZINC000005819214	-6.2
ZINC000005844788	-7.3
ZINC000005844788	-6.6
ZINC000005844792	-7.2
ZINC000005844792	-6.9
ZINC000006021033	-4.1
ZINC000006021043	-4.2
ZINC000006036847	-4.1
ZINC000006094354	-7
ZINC000006094354	-7
ZINC000006382803	-5.1
ZINC000006382803	-5
ZINC000006409735	-5.8
ZINC000006409735	-5.4
ZINC000006467621	-7
ZINC000006627681	-6
ZINC000006627681	-6
ZINC000006661227	-4.7
ZINC000006661227	-4.6
ZINC000006661227	-4.5
ZINC000006716957	-9
ZINC000006716957	-8.7
ZINC000006733300	-5.2
ZINC000006745272	-8
ZINC000006827693	-3.1
ZINC000006827693	-3
ZINC000006827695	-4.5
ZINC000006827695	-4.5
ZINC000006827695	-4.4
ZINC000006845860	-4.4
ZINC000006845963	-4.1
ZINC000006858022	-6.9
ZINC000006920384	-4.2
ZINC000007997568	-6.1
ZINC000007997568	-6
ZINC000007997897	-5.8
ZINC000007997897	-5.8
ZINC000007997897	-5.6
ZINC000007997952	-5.5
ZINC000007997952	-5.5
ZINC000007997966	-8
ZINC000007997966	-7.8
ZINC000008015016	-4.2
ZINC000008015016	-4.2
ZINC000008015016	-4.1
ZINC000008034120	-4.2
ZINC000008034121	-2.2
ZINC000008035268	-5.1
ZINC000008101109	-4.2
ZINC000008101109	-4.2
ZINC000008101109	-4
ZINC000008101126	-2.8
ZINC000008101127	-8.4
ZINC000008214402	-5.3
ZINC000008214402	-5.2
ZINC000008214418	-6.2
ZINC000008214514	-3.2
ZINC000008214573	-3.5
ZINC000008214573	-3.3
ZINC000008214614	-4.7
ZINC000008214614	-4.6
ZINC000008214619	-6.5
ZINC000008214625	-5
ZINC000008214629	-4.6
ZINC000008214635	-5
ZINC000008214651	-4.2
ZINC000008214692	-6.7
ZINC000008214703	-5.7
ZINC000008220878	-5.4
ZINC000008220878	-4.9
ZINC000008220909	-7.7
ZINC000008403947	-4.2
ZINC000008437287	-4.1
ZINC000008466459	-4.1
ZINC000008552123	-6.4
ZINC000008552123	-6.3
ZINC000008552123	-6
ZINC000008577218	-7.9
ZINC000008855117	-6.7
ZINC000008855117	-6.7
ZINC000009164421	-6.8
ZINC000009212427	-8.1
ZINC000009212427	-8
ZINC000009212427	-7.9
ZINC000009212428	-7.9
ZINC000009212428	-7.9
ZINC000009212428	-7.9
ZINC000009212654	-6.2
ZINC000009224016	-5.6
ZINC000009224016	-5.6
ZINC000009302201	-6.3
ZINC000009302239	-6
ZINC000011615926	-6.4
ZINC000011615927	-6.6
ZINC000011615928	-6.7
ZINC000011616882	-7.7
ZINC000011616925	-7.3
ZINC000011617039	-8.8
ZINC000011677376	-7.1
ZINC000011677376	-6.9
ZINC000011677376	-6.8
ZINC000011677837	-8.4
ZINC000011677857	-7.6
ZINC000011679756	-8.2
ZINC000011679756	-8.1
ZINC000011680067	-6.9
ZINC000011680943	-5.5
ZINC000011680943	-5.4
ZINC000011681534	-7.1
ZINC000011681534	-7.1
ZINC000011681563	-8.5
ZINC000011681563	-8.5
ZINC000011726211	-7.3
ZINC000011726211	-7.1
ZINC000012358719	-4.6
ZINC000012360535	-5.9
ZINC000012360535	-5.6
ZINC000012360535	-5.2
ZINC000012402836	-6
ZINC000012404516	-7
ZINC000012404516	-6.9
ZINC000012414057	-6.2
ZINC000012466082	-5.7
ZINC000012466082	-5.7
ZINC000012468792	-5.9
ZINC000012484958	-6.2
ZINC000012495062	-5.9
ZINC000012503068	-6.9
ZINC000012503076	-5
ZINC000012503099	-6.5
ZINC000012503099	-6.4
ZINC000012503151	-5.7
ZINC000012503156	-4.7
ZINC000012503177	-5.3
ZINC000012503187	-8.2
ZINC000012503187	-8.2
ZINC000012503291	-6.5
ZINC000012661824	-6.7
ZINC000012859773	-4.5
ZINC000013129998	-6.5
ZINC000013298313	-4.9
ZINC000013298313	-4.8
ZINC000013512456	-5.9
ZINC000013512456	-5.8
ZINC000013520815	-6.8
ZINC000013537284	-7.1
ZINC000013537284	-7
ZINC000013540519	-7
ZINC000013545634	-5.2
ZINC000013545634	-5.2
ZINC000013545636	-5.2
ZINC000013545636	-5.1
ZINC000013550868	-4.7
ZINC000013585233	-6.1
ZINC000013585233	-5.9
ZINC000013585233	-5.8
ZINC000013587680	-6.3
ZINC000013597823	-6.3
ZINC000013597823	-6
ZINC000013648755	-6.5
ZINC000013648755	-6.3
ZINC000013682481	-7.3
ZINC000013682481	-7.2
ZINC000013818943	-7.7
ZINC000013831130	-8.1
ZINC000013831130	-8.1
ZINC000013831141	-6.2
ZINC000013911941	-7.6
ZINC000013912394	-6
ZINC000013973998	-5.9
ZINC000013986658	-8
ZINC000013986658	-7.8
ZINC000014164617	-7
ZINC000014210455	-7
ZINC000014210457	-7
ZINC000014210642	-8.5
ZINC000014210642	-8.4
ZINC000014210876	-7.6
ZINC000014210876	-7.5
ZINC000014261579	-8.1
ZINC000014263142	-7.2
ZINC000014768621	-7
ZINC000014768621	-6.2
ZINC000014879972	-8
ZINC000014879992	-8
ZINC000014879992	-7.8
ZINC000014879992	-7.8
ZINC000014879992	-7.6
ZINC000014881137	-4.3
ZINC000014961096	-6.6
ZINC000016052277	-8
ZINC000016052277	-7.9
ZINC000016052277	-7.7
ZINC000016052277	-7.5
ZINC000016159083	-7.5
ZINC000016159083	-7.4
ZINC000016929327	-5.9
ZINC000017146904	-6.2
ZINC000017146904	-5.6
ZINC000017285869	-5.3
ZINC000017285872	-5.1
ZINC000018043251	-5.6
ZINC000018089317	-5.5
ZINC000018099446	-6
ZINC000018115268	-5.3
ZINC000018115268	-5
ZINC000018203737	-5.5
ZINC000018203737	-5.2
ZINC000018279854	-6.1
ZINC000018324776	-8.1
ZINC000018324776	-7.5
ZINC000018324776	-7.3
ZINC000018516586	-8.2
ZINC000018516586	-8.2
ZINC000019144216	-5.9
ZINC000019144216	-5.7
ZINC000019144226	-5.8
ZINC000019144226	-5.7
ZINC000019144231	-5.8
ZINC000019144231	-5.8
ZINC000019156872	-6.3
ZINC000019156872	-6.3
ZINC000019156872	-6.2
ZINC000019166988	-5.5
ZINC000019166991	-4.7
ZINC000019168887	-6
ZINC000019203912	-7.4
ZINC000019203912	-7.4
ZINC000019203912	-7.4
ZINC000019228902	-6.8
ZINC000019228902	-6.7
ZINC000019228902	-6.7
ZINC000019361042	-7.1
ZINC000019361042	-6.7
ZINC000019362735	-6.4
ZINC000019362735	-6.2
ZINC000019362735	-6.2
ZINC000019362737	-6.2
ZINC000019362737	-6.2
ZINC000019362737	-6.1
ZINC000019363537	-3.9
ZINC000019363537	-3.7
ZINC000019364219	-4.7
ZINC000019364219	-4.5
ZINC000019364222	-6.5
ZINC000019364222	-6.4
ZINC000019364222	-6.4
ZINC000019364224	-6.6
ZINC000019364224	-6.5
ZINC000019364224	-6
ZINC000019364225	-3.7
ZINC000019364225	-3.7
ZINC000019364229	-6.5
ZINC000019364229	-6.5
ZINC000019364229	-6.4
ZINC000019364230	-6.9
ZINC000019364230	-6.6
ZINC000019364230	-6.4
ZINC000019364242	-5.5
ZINC000019364242	-5.4
ZINC000019418959	-7.6
ZINC000019418959	-7.5
ZINC000019418959	-7.5
ZINC000019419017	-5.9
ZINC000019419017	-5.9
ZINC000019419017	-5.8
ZINC000019594557	-6.9
ZINC000019594557	-6.9
ZINC000019594594	-5.5
ZINC000019594594	-5.3
ZINC000019594599	-5.9
ZINC000019594599	-5.9
ZINC000019594599	-5.6
ZINC000019632614	-7.6
ZINC000019632614	-7.1
ZINC000019632618	-8
ZINC000019632618	-7.8
ZINC000019632618	-7.8
ZINC000019632628	-7
ZINC000019632628	-7
ZINC000019632633	-4.7
ZINC000019632633	-4.6
ZINC000019632633	-4.5
ZINC000019632668	-6.7
ZINC000019632668	-6.5
ZINC000019632670	-6.9
ZINC000019632670	-6.6
ZINC000019632706	-6
ZINC000019632713	-6.6
ZINC000019632718	-6.5
ZINC000019632834	-7.3
ZINC000019632834	-7.3
ZINC000019632834	-7.2
ZINC000019632912	-6.1
ZINC000019632917	-6.7
ZINC000019632917	-6.3
ZINC000019702309	-5.8
ZINC000019702309	-5.8
ZINC000019796018	-6.8
ZINC000019796018	-6.8
ZINC000019796018	-6.8
ZINC000019796080	-7.8
ZINC000019796080	-7.6
ZINC000019796080	-7.2
ZINC000019796087	-7.4
ZINC000019796087	-7.4
ZINC000019796087	-7.2
ZINC000019796155	-6.9
ZINC000019796155	-6.7
ZINC000019796158	-7.2
ZINC000019796158	-7.2
ZINC000019796168	-7.8
ZINC000019796168	-7.5
ZINC000019796168	-7.5
ZINC000019875504	-4.9
ZINC000019875504	-4.6
ZINC000021297660	-7.1
ZINC000021297660	-6.9
ZINC000021303210	-6.3
ZINC000021303210	-6.2
ZINC000021981454	-7.9
ZINC000021982937	-6.6
ZINC000021982937	-6.5
ZINC000021982937	-6.3
ZINC000021982937	-6.3
ZINC000021982937	-6.3
ZINC000022002214	-6.4
ZINC000022002214	-6.2
ZINC000022002218	-6.1
ZINC000022002218	-6
ZINC000022010375	-5.3
ZINC000022010375	-5.1
ZINC000022010375	-5.1
ZINC000022010379	-5.1
ZINC000022010379	-5
ZINC000022010379	-4.9
ZINC000022010382	-4.9
ZINC000022010382	-4.8
ZINC000022010382	-4.8
ZINC000022010387	-5.3
ZINC000022010387	-5.3
ZINC000022010387	-5.3
ZINC000022010649	-6.5
ZINC000022016976	-6.7
ZINC000022016976	-6.4
ZINC000022016976	-6.2
ZINC000022016981	-6.7
ZINC000022016981	-6.5
ZINC000022016981	-6.1
ZINC000022056030	-4.9
ZINC000022056030	-4.7
ZINC000022056030	-4.6
ZINC000022059268	-6.2
ZINC000022059926	-7.5
ZINC000022059930	-7.6
ZINC000022065398	-6.8
ZINC000022116608	-7.3
ZINC000022116608	-7.1
ZINC000022116612	-7.3
ZINC000022116612	-6.9
ZINC000022443609	-6.6
ZINC000022447798	-6
ZINC000022447798	-5.6
ZINC000022448097	-6.5
ZINC000022448097	-6.5
ZINC000022448097	-6
ZINC000022448696	-8
ZINC000022448696	-8
ZINC000022448696	-7.8
ZINC000022448696	-7.5
ZINC000022448696	-7.5
ZINC000022448983	-7
ZINC000022448983	-7
ZINC000022448983	-6.4
ZINC000022851765	-6.7
ZINC000022851765	-6.5
ZINC000022851765	-6.4
ZINC000026011099	-7.4
ZINC000026011099	-6.9
ZINC000026664090	-8.8
ZINC000026664090	-8.7
ZINC000026664090	-8.6
ZINC000026985532	-8.5
ZINC000026985532	-8.5
ZINC000026985532	-8
ZINC000027428713	-7.8
ZINC000027428713	-7.8
ZINC000027990463	-8.3
ZINC000028108825	-6.8
ZINC000028108825	-6.7
ZINC000028108825	-6.7
ZINC000028232750	-7.6
ZINC000028232750	-7.6
ZINC000028232750	-7.4
ZINC000028467879	-7.6
ZINC000028467879	-7.6
ZINC000028639340	-7.8
ZINC000028957444	-7.5
ZINC000028973441	-7.2
ZINC000028973446	-6.5
ZINC000029319828	-6.9
ZINC000029319828	-6.5
ZINC000029416466	-8.5
ZINC000029416466	-8.4
ZINC000029416466	-8.4
ZINC000029571072	-7.6
ZINC000029571072	-7.4
ZINC000030690433	-7.4
ZINC000030690433	-7.3
ZINC000030690433	-7.2
ZINC000030691727	-7.1
ZINC000030691736	-7.2
ZINC000030691754	-7.2
ZINC000030691760	-6.6
ZINC000030691763	-6.7
ZINC000030691797	-7.6
ZINC000031274852	-7.3
ZINC000031274852	-7.3
ZINC000033943508	-6.6
ZINC000033965961	-6.4
ZINC000033965961	-6.4
ZINC000033965961	-6.3
ZINC000033965961	-6.1
ZINC000033965961	-6.1
ZINC000034051848	-6.8
ZINC000034051848	-6.8
ZINC000034089131	-7
ZINC000034220093	-6.7
ZINC000034608502	-7.4
ZINC000034636383	-7.4
ZINC000034676245	-4.2
ZINC000034676245	-4.1
ZINC000034676245	-4.1
ZINC000034781704	-6.1
ZINC000034806477	-7.1
ZINC000035024346	-5.5
ZINC000035328014	-7.5
ZINC000035328014	-7.3
ZINC000035342789	-7
ZINC000035653007	-6.9
ZINC000035653009	-6.9
ZINC000035801098	-7.7
ZINC000035801098	-7.6
ZINC000035902489	-7.5
ZINC000035902489	-7.3
ZINC000035999642	-5.4
ZINC000035999642	-5.4
ZINC000036294079	-5.3
ZINC000036294079	-5.3
ZINC000036520252	-7.9
ZINC000036701290	-7.8
ZINC000036701290	-7.8
ZINC000036766734	-6.2
ZINC000038140873	-4.2
ZINC000038197764	-8.5
ZINC000038197764	-8.4
ZINC000038212689	-5
ZINC000038212689	-4.9
ZINC000038945666	-5.7
ZINC000040430143	-8.9
ZINC000040899447	-7.1
ZINC000043100709	-9.3
ZINC000043100953	-7.9
ZINC000043100953	-7.9
ZINC000043100953	-7.8
ZINC000043194409	-6
ZINC000043195697	-7
ZINC000043195697	-6.9
ZINC000043195697	-6.9
ZINC000043195697	-6.8
ZINC000043195697	-6.7
ZINC000043200832	-6.4
ZINC000043200832	-6.4
ZINC000043200832	-6.3
ZINC000043202140	-6.9
ZINC000043202140	-6.8
ZINC000043206370	-7.1
ZINC000043207238	-8.3
ZINC000043207851	-6.9
ZINC000043450324	-7.8
ZINC000043450324	-6.9
ZINC000043450326	-7.3
ZINC000043450326	-7
ZINC000043763856	-4.3
ZINC000049036447	-8
ZINC000049637509	-6.7
ZINC000049637509	-6.4
ZINC000049643479	-6.7
ZINC000049783788	-7.3
ZINC000049783788	-7.1
ZINC000049783788	-7
ZINC000049841054	-6.8
ZINC000049933061	-6.1
ZINC000051133897	-7.1
ZINC000051951647	-7.2
ZINC000052509366	-8.6
ZINC000052509366	-8.1
ZINC000052509463	-6.6
ZINC000052509463	-6.5
ZINC000052509463	-6.5
ZINC000052716421	-7.5
ZINC000052716421	-7.5
ZINC000052955754	-8.8
ZINC000052955754	-8.7
ZINC000052955754	-8.4
ZINC000052957434	-7
ZINC000052957434	-7
ZINC000052971887	-4.4
ZINC000052971887	-4.1
ZINC000053022902	-4
ZINC000053022902	-4
ZINC000053084692	-6.6
ZINC000053084692	-6.5
ZINC000053229445	-7.2
ZINC000053229445	-7.2
ZINC000053683151	-8.4
ZINC000053683151	-8
ZINC000053683151	-7.7
ZINC000053683345	-7.8
ZINC000058581064	-8.1
ZINC000060325170	-7.3
ZINC000064033452	-9.1
ZINC000066166864	-7.1
ZINC000066166864	-7
ZINC000068153186	-8
ZINC000068153186	-7.3
ZINC000068202099	-6.9
ZINC000068204830	-5.4
ZINC000068247389	-8.1
ZINC000068247389	-7.7
ZINC000070466416	-7.7
ZINC000070466416	-7.5
ZINC000072267023	-6.6
ZINC000072267023	-6
ZINC000072316335	-8
ZINC000072316335	-7.9
ZINC000072318121	-8
ZINC000072318121	-8
ZINC000084400879	-7.4
ZINC000084400879	-7.3
ZINC000084400879	-7.3
ZINC000084441937	-8.1
ZINC000084441937	-8.1
ZINC000084441937	-7.7
ZINC000084589076	-6.7
ZINC000084668739	-8.5
ZINC000084757007	-6.7
ZINC000084758235	-7.7
ZINC000084758479	-8
ZINC000084758479	-7.8
ZINC000084843283	-5.3
ZINC000085205448	-5.9
ZINC000085205451	-6.7
ZINC000085432544	-7.1
ZINC000085432544	-6.6
ZINC000085432544	-6.5
ZINC000085432544	-6.5
ZINC000085537014	-7.4
ZINC000085537014	-6.6
ZINC000085537017	-7.5
ZINC000085537017	-6.8
ZINC000085537017	-6.7
ZINC000085537053	-7.1
ZINC000085540215	-6.2
ZINC000085540219	-6
ZINC000085540223	-6.1
ZINC000085555528	-7.7
ZINC000085555528	-7.6
ZINC000085555528	-6.5
ZINC000085555528	-6.5
ZINC000086040406	-4
ZINC000087515509	-7.1
ZINC000094566092	-7.8
ZINC000094566092	-7.6
ZINC000094566093	-7.2
ZINC000094566093	-7.1
ZINC000095452610	-6
ZINC000095452610	-5.9
ZINC000095551509	-6.9
ZINC000095564694	-5.9
ZINC000095564694	-5.5
ZINC000095564694	-5.3
ZINC000095616599	-6.8
ZINC000095616599	-6.6
ZINC000095616600	-7.5
ZINC000095616600	-7.5
ZINC000095616601	-7.7
ZINC000095616601	-7.7
ZINC000095616603	-7
ZINC000095616937	-7.7
ZINC000095619100	-6.8
ZINC000095619100	-6.4
ZINC000095619101	-7.3
ZINC000095619101	-7.2
ZINC000095619105	-7.4
ZINC000095619105	-7.3
[truncated: 112 more rows]
